# Supplementary material
Source: PubMed Central journal article supplement (PMC3279954)
Supplement: NIHMS355144-supplement-Supplementary_Figures.pdf [file NIHMS355144-supplement-Supplementary_Figures.pdf]

## **Supplemental Figures (ONLINE ONLY)**

(Not for print – online only) **Figure S1.** Cellular density within 0.030” cut depth wounds dressed with Xeroform™ or sIPN. Viable keratinocyte density with the stratum spinosum (top), leukocyte density within the remodeling dermis (middle), and fibroblast density with the remodeling dermis (bottom) are displayed. Data is reported as average of 10 total viewing regions from biopsies of two separate pigs ± standard error. “X” represents significant difference from Xeroform™. “U” represents significant difference from unwounded tissue ( $p < 0.05$ ) (24).

(Not for print – online only) **Figure S2.** IL-2 concentration in epidermal, remodeling dermal, and dermal tissues wounded at 0.022” cut depth and treated with Xeroform™ or sIPN. Data shown as mean ± standard error of  $n=2$  pigs with three replicates of each  $n$ -value for each time point and treatment type. “X” represents significant difference from Xeroform™, and “U” represents significant difference from unwounded tissue at  $p < 0.05$ . Remodeling dermal tissue is statistically compared to unwounded dermal tissue for all treatment types and time points.

(Not for print – online only) **Figure S3.** IL-4 concentration in epidermal, remodeling dermal, and dermal tissues wounded at 0.022” cut depth and treated with Xeroform™ or sIPN. Data shown as mean ± standard error of  $n=2$  pigs and three replicates of each  $n$ -value for each time point and treatment type. “X” represents significant difference from Xeroform™, and “U” represents significant difference from unwounded tissue at  $p < 0.05$ . Remodeling dermal tissue is statistically compared to unwounded dermal tissue for all treatment types and time points.

(Not for print – online only) **Figure S4.** IL-12p70 concentration in epidermal, remodeling dermal, and dermal tissues wounded at 0.022” cut depth and treated with Xeroform™ or sIPN. Data shown as mean ± standard error of  $n=2$  pigs and three replicates of each  $n$ -value for each time point and treatment type. “X” represents significant difference from Xeroform™, and “U” represents significant difference from unwounded tissue at  $p < 0.05$ . Remodeling dermal tissue is statistically compared to unwounded dermal tissue for all treatment types and time points.

(Not for print – online only) **Figure S5.** IL-1 $\beta$  concentration in epidermal, remodeling dermal, and dermal tissues wounded at 0.030” cut depth and treated with Xeroform™ or sIPN. Data shown as mean ± standard error of  $n=2$  pigs with three replicates of each  $n$ -value for each time point and treatment type. “X” represents significant difference from Xeroform™, and “U” represents significant difference from unwounded tissue at  $p < 0.05$ . Remodeling dermal tissue is statistically compared to unwounded dermal tissue for all treatment types and time points.

(Not for print – online only) **Figure S6.** IL-2 concentration in epidermal, remodeling dermal, and dermal tissues wounded at 0.030” cut depth and treated with Xeroform™ or sIPN. Data shown as mean ± standard error of  $n=2$  pigs with three replicates of each  $n$ -value for each time point and treatment type. “X” represents significant difference from Xeroform™, and “U” represents significant difference from unwounded tissue at  $p < 0.05$ . Remodeling dermal tissue is statistically compared to unwounded dermal tissue for all treatment types and time points.

(Not for print – online only) **Figure S7.** IL-4 concentration in epidermal, remodeling dermal, and dermal tissues wounded at 0.030” cut depth and treated with Xeroform™ or sIPN. Data shown

as mean  $\pm$  standard error of  $n=2$  pigs and three replicates of each  $n$ -value for each time point and treatment type. “X” represents significant difference from Xeroform<sup>TM</sup>, and “U” represents significant difference from unwounded tissue at  $p < 0.05$ . Remodeling dermal tissue is statistically compared to unwounded dermal tissue for all treatment types and time points.

(Not for print – online only) **Figure S8.** IL-6 concentration in epidermal, remodeling dermal, and dermal tissues wounded at 0.030” cut depth and treated with Xeroform<sup>TM</sup> or sIPN. Data shown as mean  $\pm$  standard error of  $n=2$  pigs and three replicates of each  $n$ -value for each time point and treatment type. “X” represents significant difference from Xeroform<sup>TM</sup>, and “U” represents significant difference from unwounded tissue at  $p < 0.05$ . Remodeling dermal tissue is statistically compared to unwounded dermal tissue for all treatment types and time points.

(Not for print – online only) **Figure S9.** IL-8 concentration in epidermal, remodeling dermal, and dermal tissues wounded at 0.030” cut depth and treated with Xeroform<sup>TM</sup> or sIPN. Data shown as mean  $\pm$  standard error of  $n=2$  pigs and three replicates of each  $n$ -value for each time point and treatment type. “X” represents significant difference from Xeroform<sup>TM</sup>, and “U” represents significant difference from unwounded tissue at  $p < 0.05$ . Remodeling dermal tissue is statistically compared to unwounded dermal tissue for all treatment types and time points.

(Not for print – online only) **Figure S10.** IL-10 concentration in epidermal, remodeling dermal, and dermal tissues wounded at 0.030” cut depth and treated with Xeroform<sup>TM</sup> or sIPN. Data shown as mean  $\pm$  standard error of  $n=2$  pigs and three replicates of each  $n$ -value for each time point and treatment type. “X” represents significant difference from Xeroform<sup>TM</sup>, and “U” represents significant difference from unwounded tissue at  $p < 0.05$ . Remodeling dermal tissue is statistically compared to unwounded dermal tissue for all treatment types and time points.

(Not for print – online only) **Figure S11.** IL-12p70 concentration in epidermal, remodeling dermal, and dermal tissues wounded at 0.030” cut depth and treated with Xeroform<sup>TM</sup> or sIPN. Data shown as mean  $\pm$  standard error of  $n=2$  pigs and three replicates of each  $n$ -value for each time point and treatment type. “X” represents significant difference from Xeroform<sup>TM</sup>, and “U” represents significant difference from unwounded tissue at  $p < 0.05$ . Remodeling dermal tissue is statistically compared to unwounded dermal tissue for all treatment types and time points.

(Not for print – online only) **Figure S12.** IFN- $\gamma$  concentration in epidermal, remodeling dermal, and dermal tissues wounded at 0.030” cut depth and treated with Xeroform<sup>TM</sup> or sIPN. Data shown as mean  $\pm$  standard error of  $n=2$  pigs and three replicates of each  $n$ -value for each time point and treatment type. “X” represents significant difference from Xeroform<sup>TM</sup>, and “U” represents significant difference from unwounded tissue at  $p < 0.05$ . Remodeling dermal tissue is statistically compared to unwounded dermal tissue for all treatment types and time points.

(Not for print – online only) **Figure S13.** TNF- $\alpha$  concentration in epidermal, remodeling dermal, and dermal tissues wounded at 0.030” cut depth and treated with Xeroform<sup>TM</sup> or sIPN. Data shown as mean  $\pm$  standard error of  $n=2$  pigs and three replicates of each  $n$ -value for each time point and treatment type. “X” represents significant difference from Xeroform<sup>TM</sup>, and “U” represents significant difference from unwounded tissue at  $p < 0.05$ . Remodeling dermal tissue is statistically compared to unwounded dermal tissue for all treatment types and time points.

(Not for print – online only) Figure S1

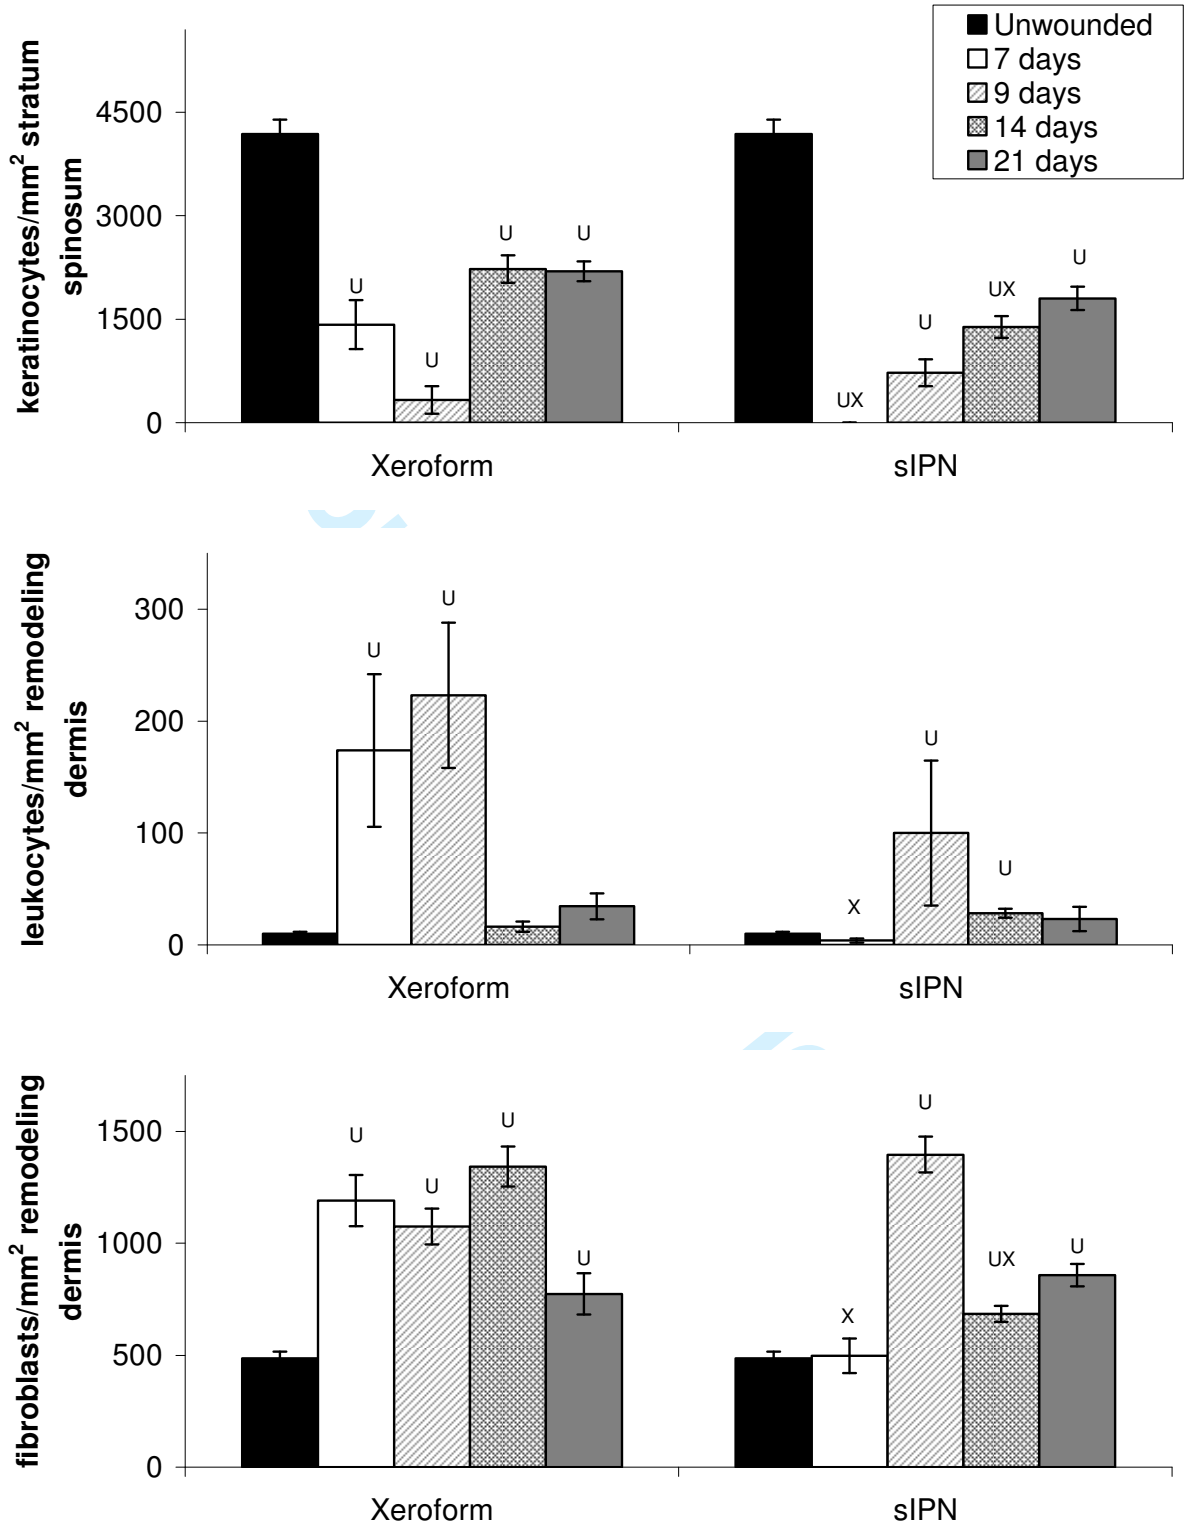

(Not for print – online only) Figure S2

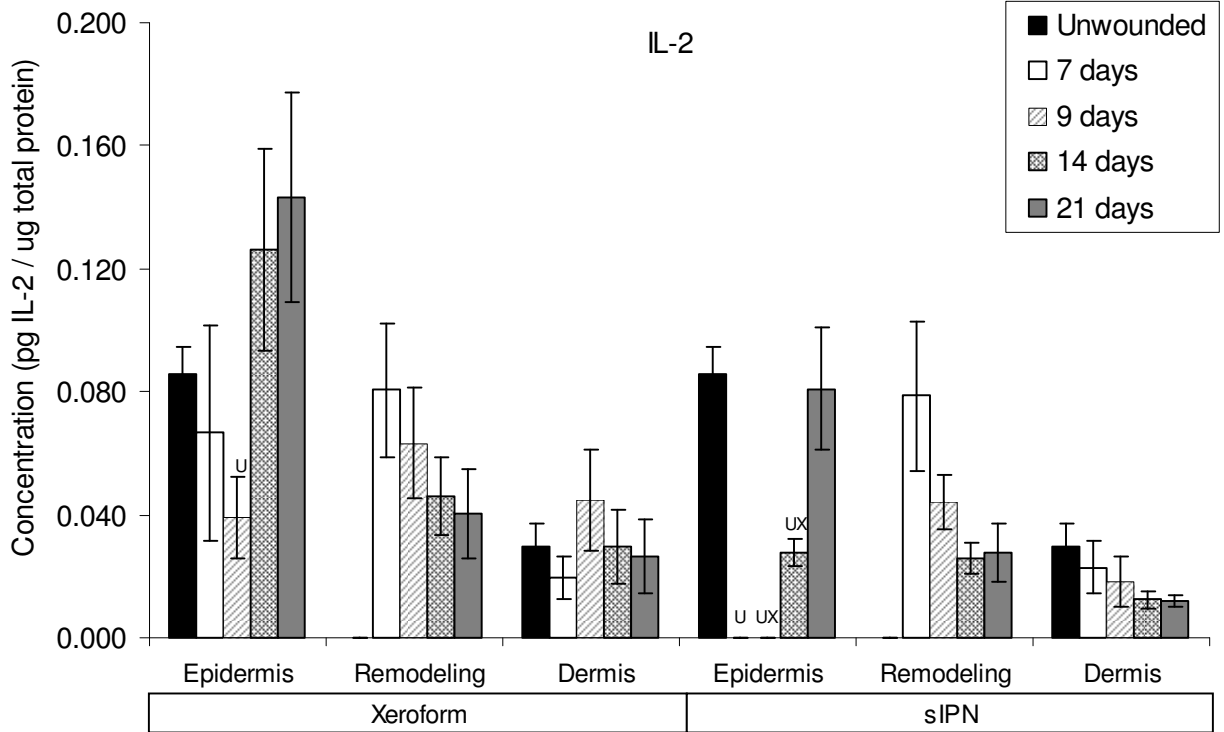

Peer Review

(Not for print – online only) Figure S3

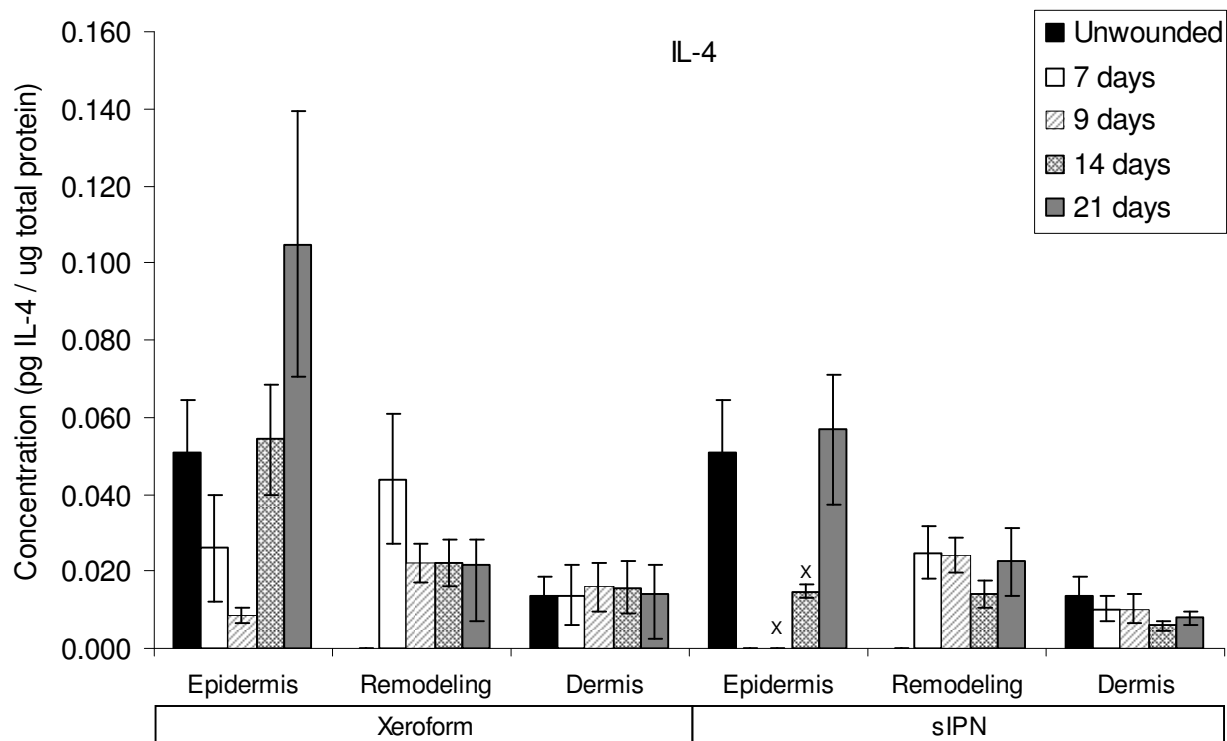

Peer Review

(Not for print – online only) Figure S4

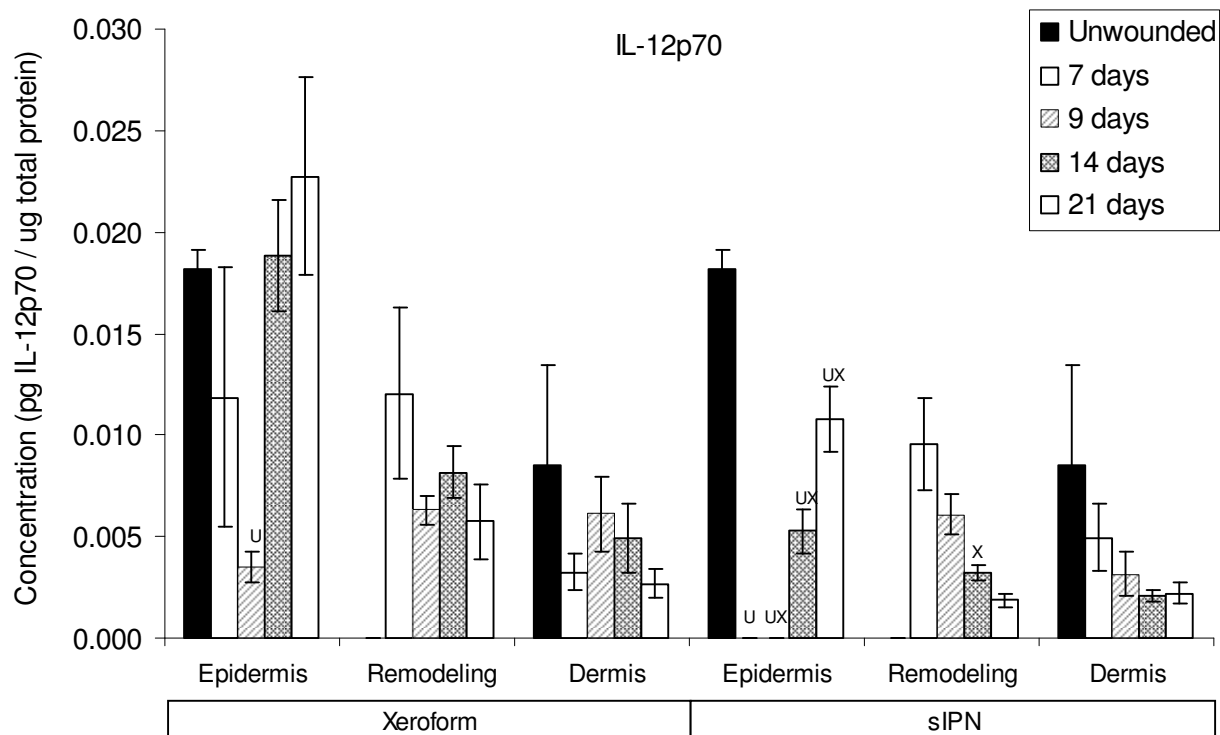

Peer Review

(Not for print – online only) Figure S5

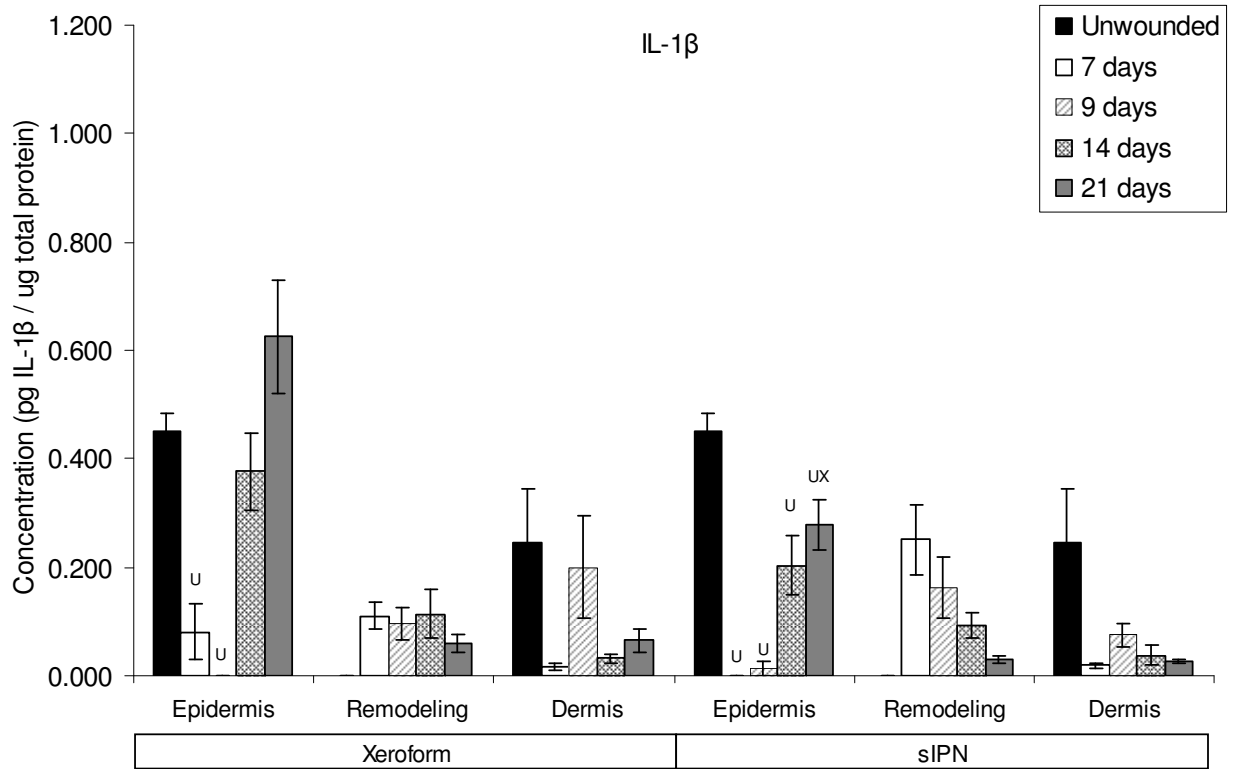

Review

(Not for print – online only) Figure S6

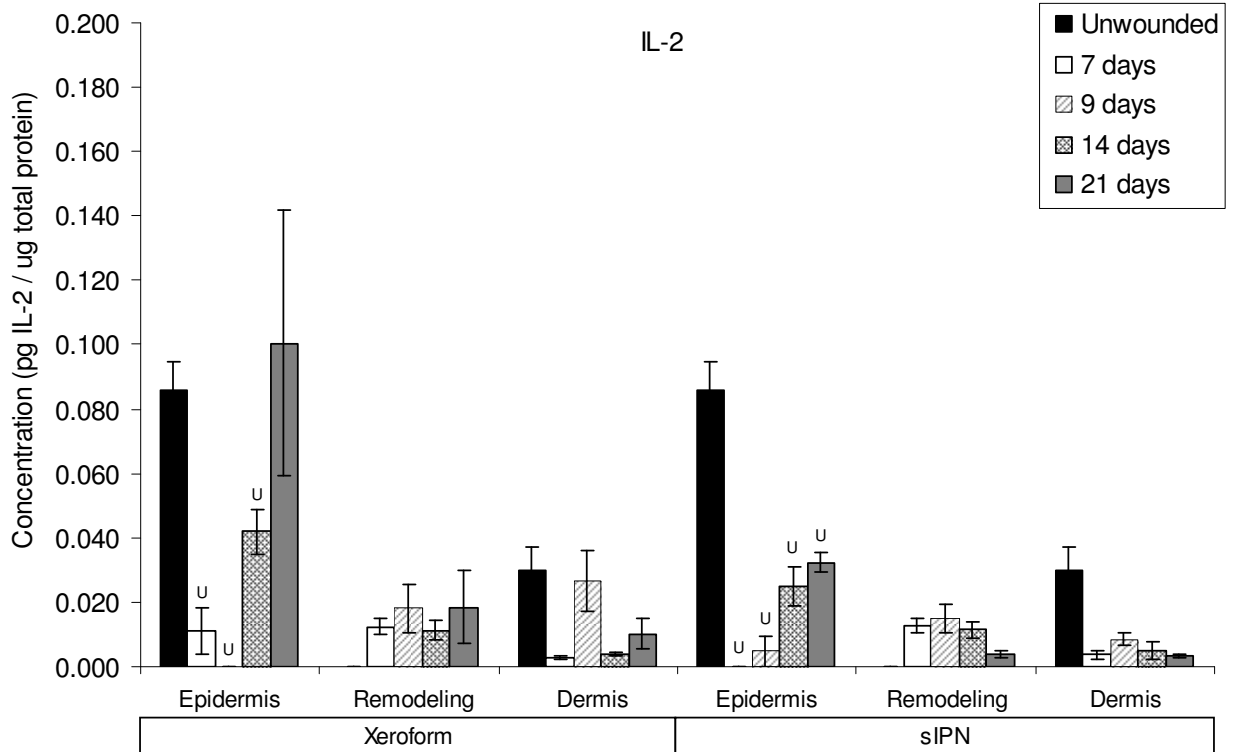

Peer Review



(Not for print – online only) Figure S7

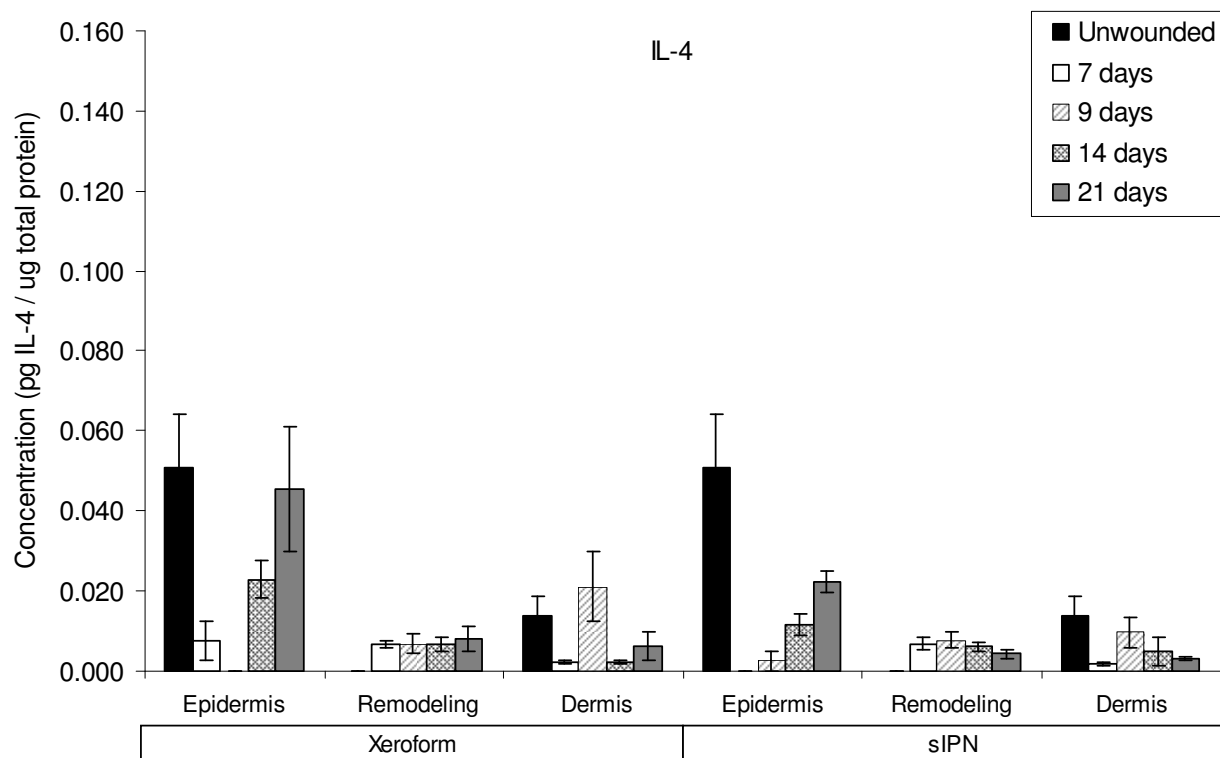

Peer Review

(Not for print – online only) Figure S8

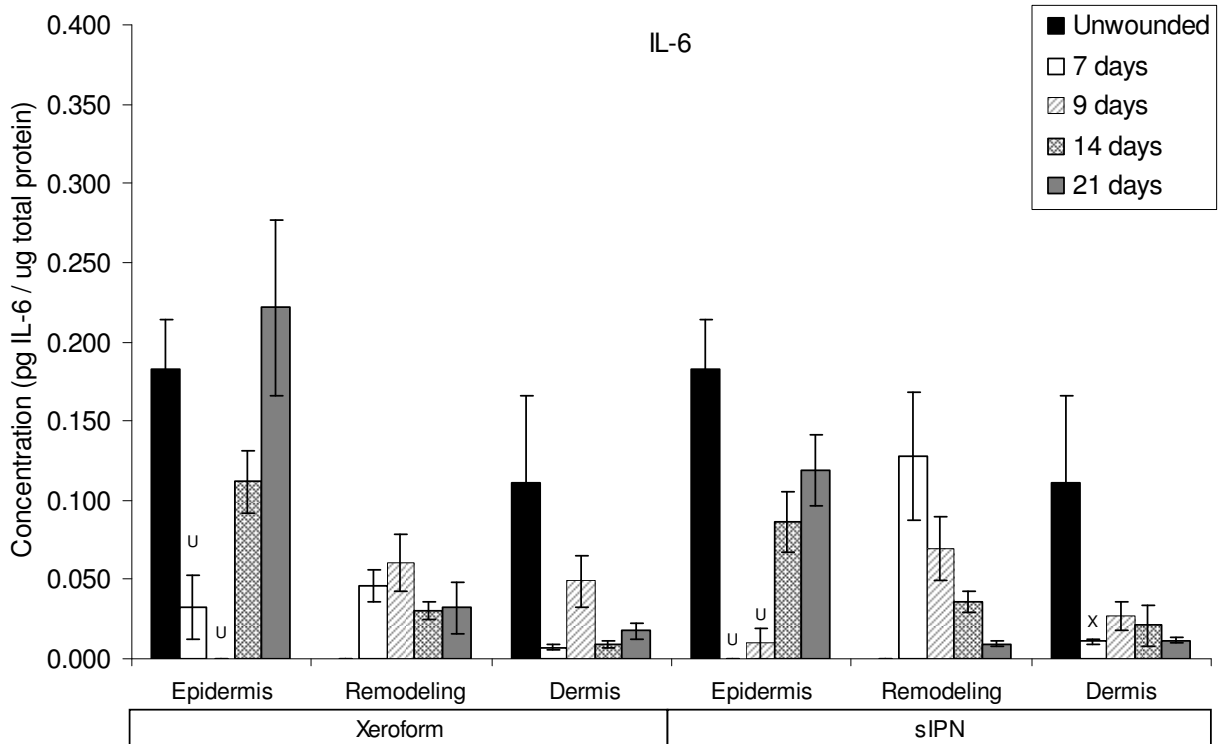

Peer Review

(Not for print – online only) Figure S9

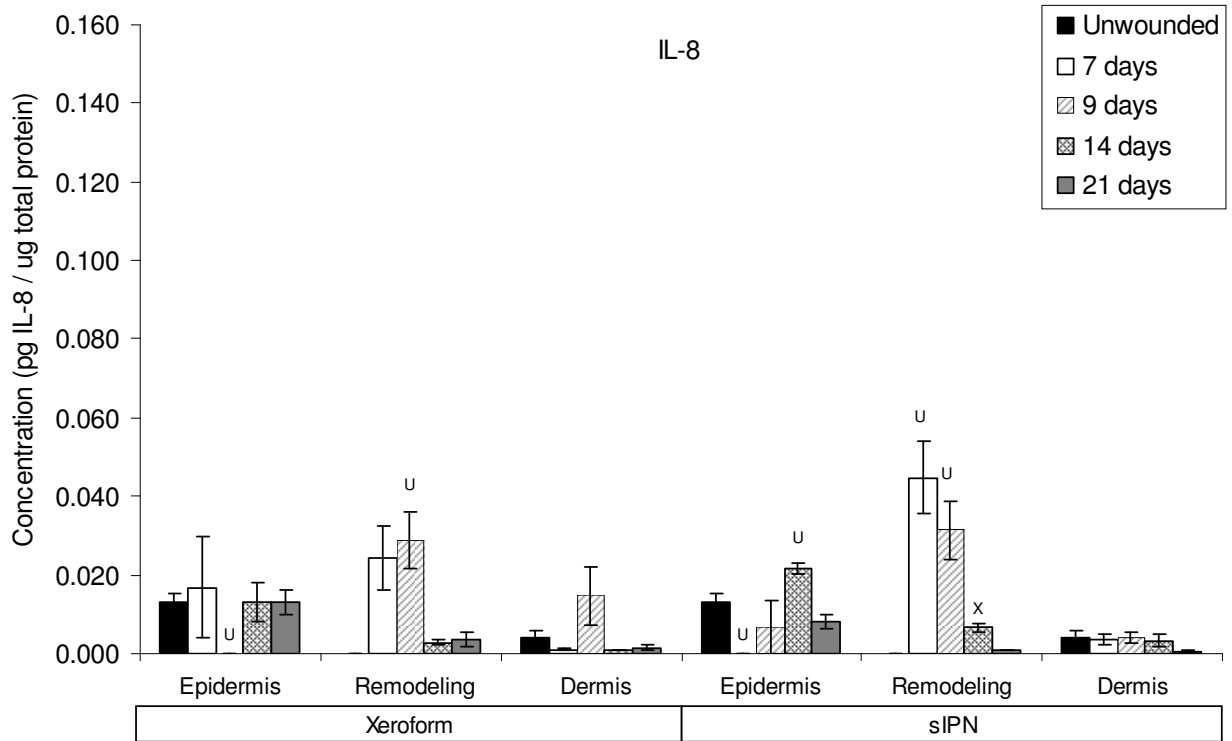

Peer Review

(Not for print – online only) Figure S10

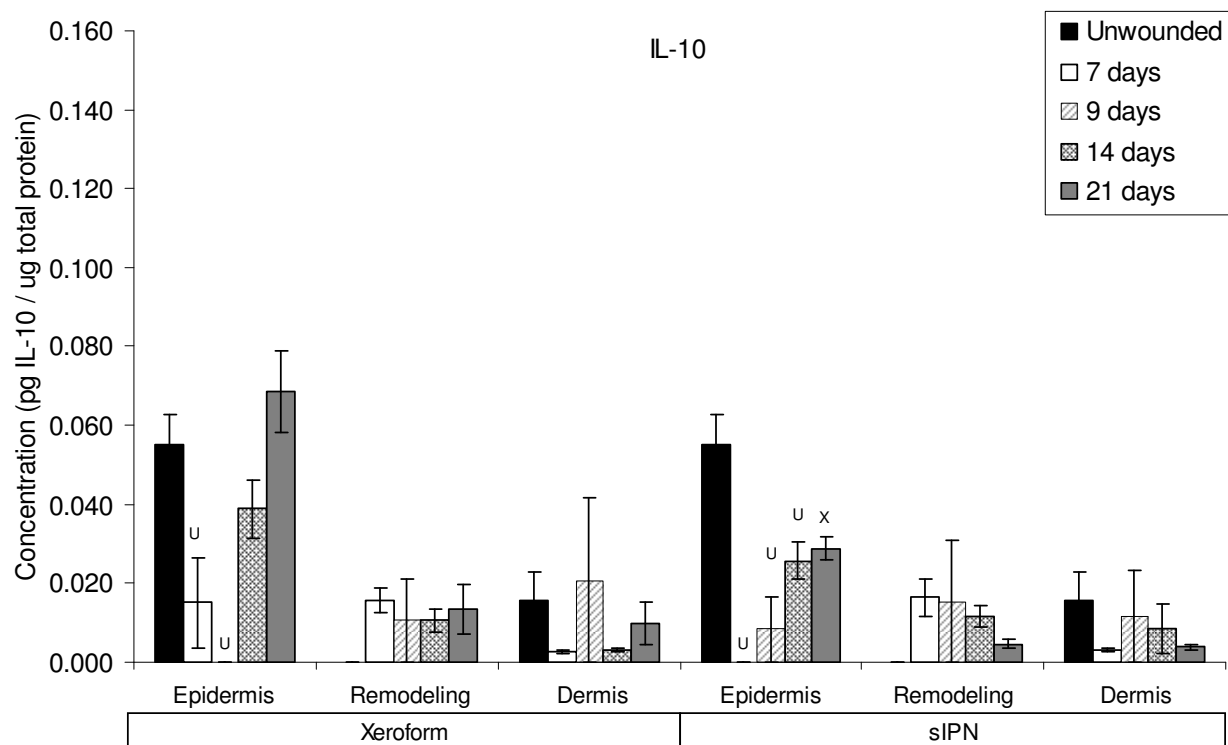

Peer Review

(Not for print – online only) Figure S11

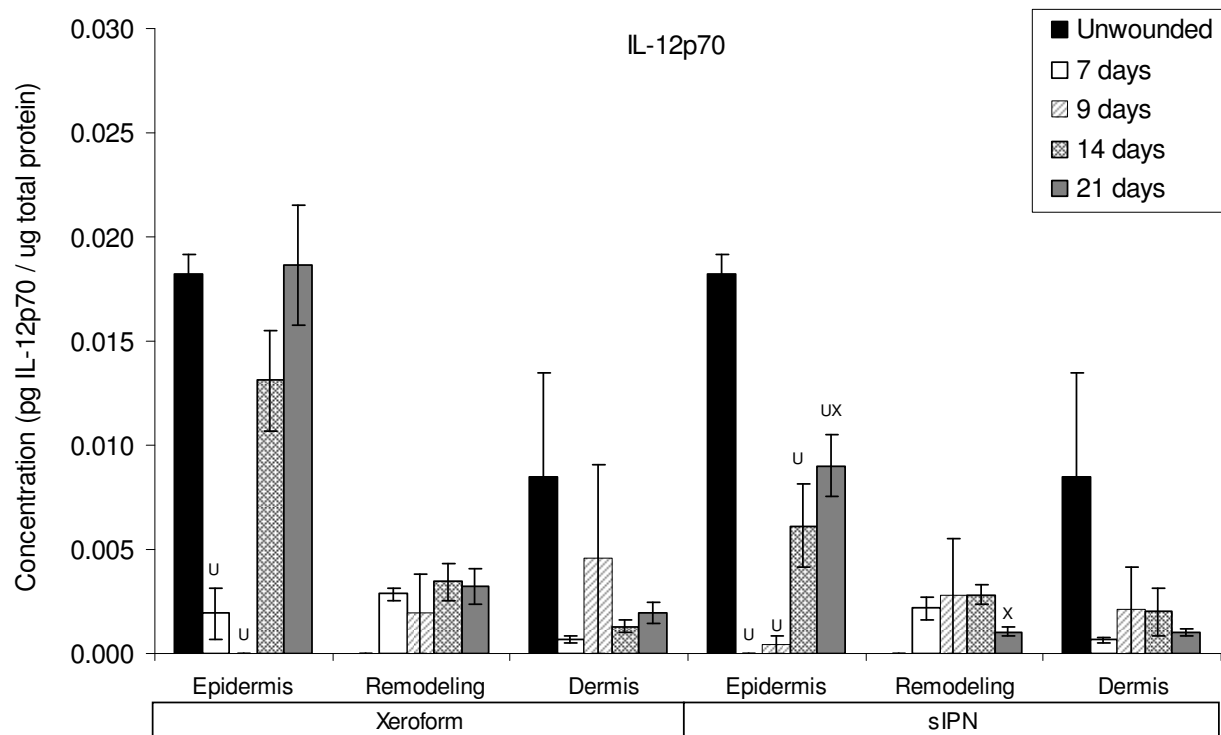

Peer Review

(Not for print – online only) Figures S12

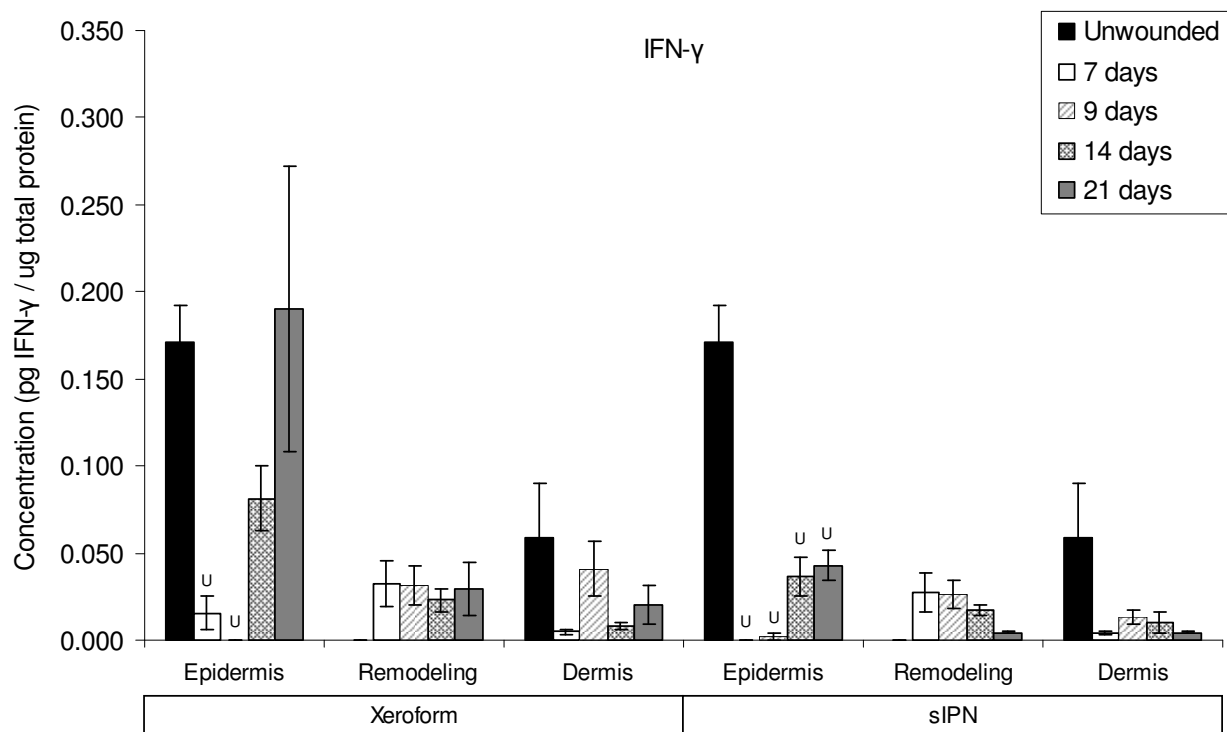

Peer Review

(Not for print – online only) Figure S13

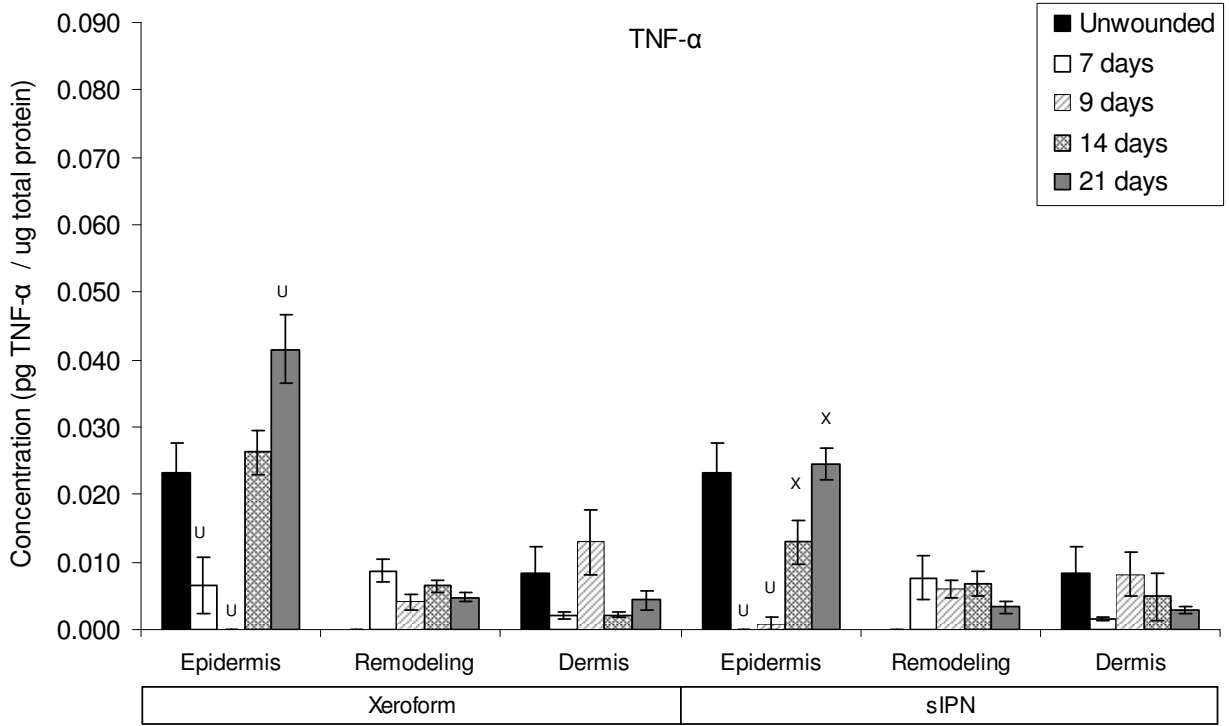

## SUPPLEMENT TABLES - ONLINE ONLY

**Table S1**

|                           |               |        |        |        |        |        |          |               |       |
|---------------------------|---------------|--------|--------|--------|--------|--------|----------|---------------|-------|
| <b>Epidermal Proteins</b> | IL-1 $\beta$  |        |        |        |        |        |          |               |       |
|                           | IL-2          | 0.935  |        |        |        |        |          |               |       |
|                           | IL-4          | 0.926  | 0.877  |        |        |        |          |               |       |
|                           | IL-6          | 0.907  | 0.886  | 0.820  |        |        |          |               |       |
|                           | IL-8          | -0.318 | -0.188 | -0.421 | -0.324 |        |          |               |       |
|                           | IL-10         | 0.932  | 0.925  | 0.846  | 0.855  | -0.252 |          |               |       |
|                           | IL-12p70      | 0.918  | 0.875  | 0.850  | 0.953  | -0.377 | 0.875    |               |       |
|                           | IFN- $\gamma$ | 0.851  | 0.914  | 0.806  | 0.804  | -0.118 | 0.856    | 0.860         |       |
|                           | TNF- $\alpha$ | 0.908  | 0.867  | 0.885  | 0.859  | -0.415 | 0.896    | 0.905         | 0.789 |
|                           | IL-1 $\beta$  | IL-2   | IL-4   | IL-6   | IL-8   | IL-10  | IL-12p70 | IFN- $\gamma$ |       |
| <b>Epidermal Proteins</b> |               |        |        |        |        |        |          |               |       |

(Not for print – online only) **Table S1.** Spearman's rank order coefficients ( $\rho$ ) are shown for the relationship between IL-1 $\beta$ , IL-2, IL-4, IL-6, IL-8, IL-10, IL-12p70, IFN- $\gamma$ , and TNF- $\alpha$  concentrations from epidermal tissue. Epidermal protein concentrations were compared with those of all other proteins. Data represents 33 analytes after imputation by omission of early epidermal data where epidermis not visible for microdissection. Data represents 23 analytes after imputation by omission of early epidermal data where epidermis not visible for microdissection.



**Table S2**

|                                   |               |       |       |       |       |       |          |               |       |  |
|-----------------------------------|---------------|-------|-------|-------|-------|-------|----------|---------------|-------|--|
| Remodeling Dermis Proteins        | IL-1 $\beta$  |       |       |       |       |       |          |               |       |  |
|                                   | IL-2          | 0.770 |       |       |       |       |          |               |       |  |
|                                   | IL-4          | 0.678 | 0.906 |       |       |       |          |               |       |  |
|                                   | IL-6          | 0.821 | 0.664 | 0.555 |       |       |          |               |       |  |
|                                   | IL-8          | 0.710 | 0.531 | 0.378 | 0.791 |       |          |               |       |  |
|                                   | IL-10         | 0.775 | 0.866 | 0.852 | 0.760 | 0.640 |          |               |       |  |
|                                   | IL-12p70      | 0.700 | 0.776 | 0.710 | 0.734 | 0.457 | 0.808    |               |       |  |
|                                   | IFN- $\gamma$ | 0.819 | 0.888 | 0.805 | 0.825 | 0.638 | 0.875    | 0.861         |       |  |
|                                   | TNF- $\alpha$ | 0.754 | 0.740 | 0.779 | 0.676 | 0.492 | 0.886    | 0.850         | 0.806 |  |
|                                   | IL-1 $\beta$  | IL-2  | IL-4  | IL-6  | IL-8  | IL-10 | IL-12p70 | IFN- $\gamma$ |       |  |
| <b>Remodeling Dermis Proteins</b> |               |       |       |       |       |       |          |               |       |  |

(Not for print – online only) **Table S2.** Spearman's rank order coefficients ( $\rho$ ) are shown for the relationship between IL-1 $\beta$ , IL-2, IL-4, IL-6, IL-8, IL-10, IL-12p70, IFN- $\gamma$ , and TNF- $\alpha$  concentrations from remodeling dermal tissue. Remodeling dermis protein concentrations were compared with those of all other proteins. Data represents 33 analytes.
